# Supplementary material for: TRIP6 promotes inflammatory damage via the activation of TRAF6 signaling in a murine model of DSS-induced colitis
Source: Springer Nature journal article supplement (doi:10.1186/s12950-021-00298-0), 2022-01-04

# Figure S1

a)

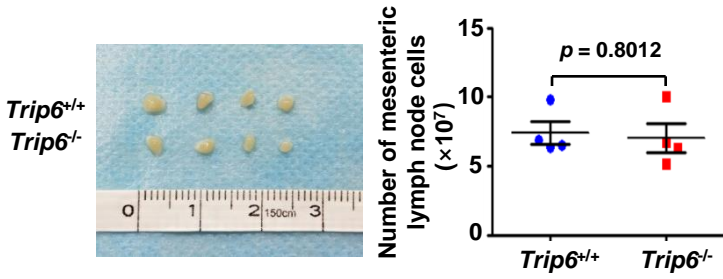

b)

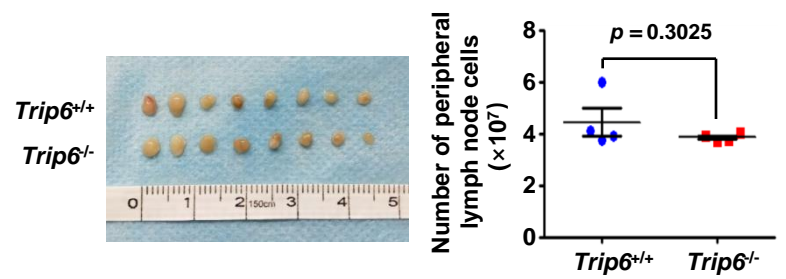

c)

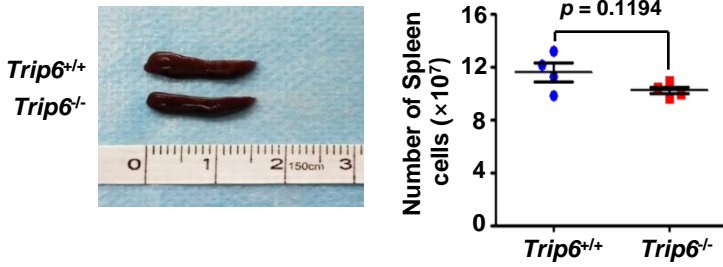

d)

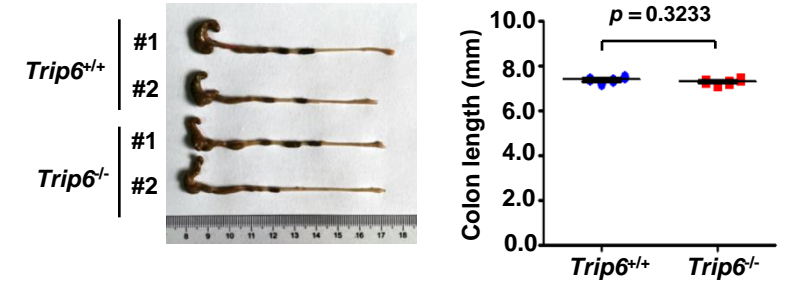

e)

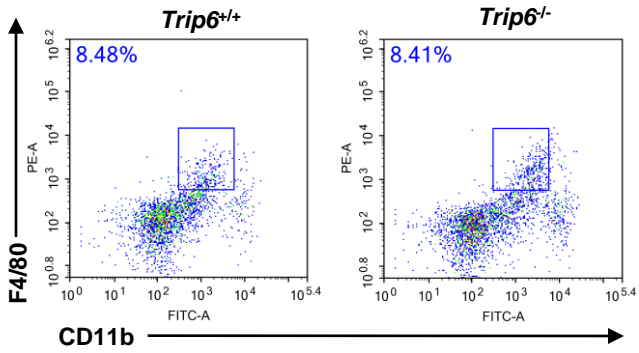

f)

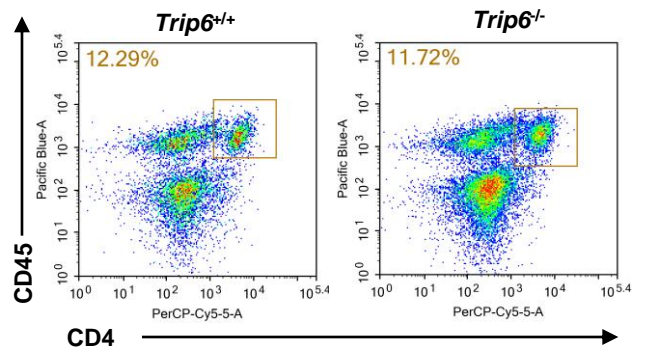

g)

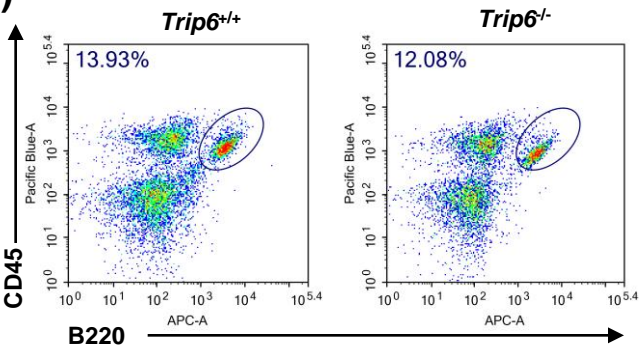

h)

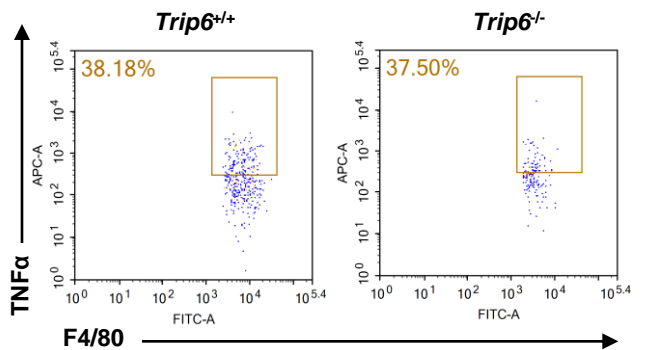

# Figure S2

a)

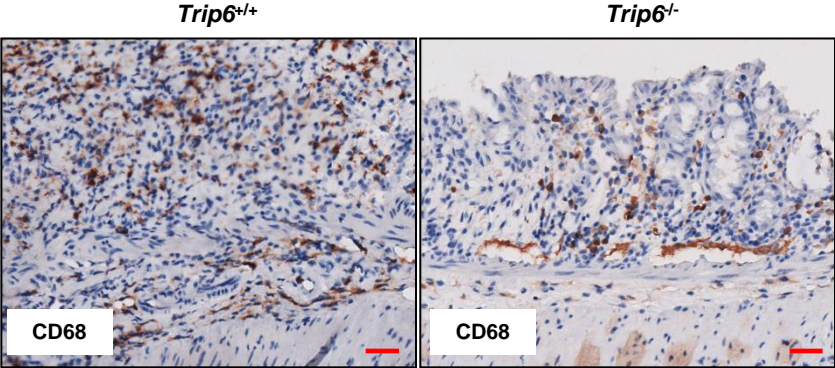

b)

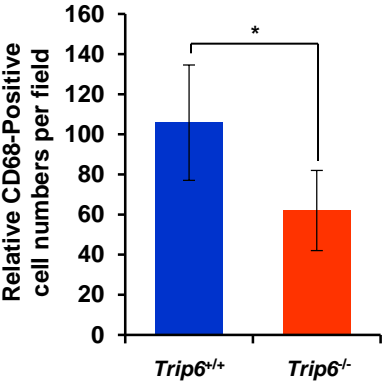

Supplement: MOESM1 [file 19999528]
