# Supplementary material for: TRIP6 promotes inflammatory damage via the activation of TRAF6 signaling in a murine model of DSS-induced colitis
Source: Springer Nature journal article supplement (doi:10.1186/s12950-021-00298-0), 2022-01-04
Supplement: MOESM2 [file 19999528]

**Supplementary Table 1: Primers for qPCR**

| <b>Mouse Gene Name</b>          | <b>Forward/Reverse</b>                                                   |
|---------------------------------|--------------------------------------------------------------------------|
| <b>TNF<math>\alpha</math></b>   | F: 5'-CTCACACTCAGATCATCTTCTC-3'<br>R: 5'-CTTTCTCCTGGTATGAGATAGC-3'       |
| <b>IL-6</b>                     | F: 5'-TTCCATCCAGTTGCCTTCTTG-3'<br>R: 5'-AGGTCTGTTGGGAGTGGTATC-3'         |
| <b><math>\beta</math>-actin</b> | F: 5'-TGGAATCCTGTGGCATCCATGAAAC-3'<br>R: 5'-TAAAACGCAGCTCAGTAACAGTCCG-3' |
