# Supplementary material for: TRIP6 promotes inflammatory damage via the activation of TRAF6 signaling in a murine model of DSS-induced colitis
Source: Springer Nature journal article supplement (doi:10.1186/s12950-021-00298-0), 2022-01-04
Supplement: MOESM3 [file 19999528]

**Supplementary Table 2: Histological grading of colitis**

| <b>Feature graded</b>        | <b>Grade</b> | <b>Description</b>                      |
|------------------------------|--------------|-----------------------------------------|
| <i>Inflammation</i>          | <b>0</b>     | <b>None</b>                             |
|                              | <b>1</b>     | <b>Slight</b>                           |
|                              | <b>2</b>     | <b>Moderate</b>                         |
|                              | <b>3</b>     | <b>Severe</b>                           |
| <i>Depth of Inflammation</i> | <b>0</b>     | <b>None</b>                             |
|                              | <b>1</b>     | <b>Mucosa</b>                           |
|                              | <b>2</b>     | <b>Submucosa</b>                        |
|                              | <b>3</b>     | <b>Transmural</b>                       |
| <i>Crypt Damage</i>          | <b>0</b>     | <b>None</b>                             |
|                              | <b>1</b>     | <b>Basal 1/3 damaged</b>                |
|                              | <b>2</b>     | <b>Basal 2/3 damaged</b>                |
|                              | <b>3</b>     | <b>Only surface epithelium intact</b>   |
|                              | <b>4</b>     | <b>Entire crypt and epithelium lost</b> |
